# Supplementary material
Source: HighWire-hosted journal article supplement (https://care.diabetesjournals.org/content/suppl/2017/08/30/dc17-0542)
Supplement: DC170542SupplementaryData.pdf [file DC170542SupplementaryData.pdf]

SUPPLEMENTARY DATA

**Supplementary Table S1.** HbA<sub>1c</sub> levels over time

**HbA<sub>1c</sub> values over time for diabetes following pancreatic disease, type 1 diabetes, and type 2 diabetes. With p values based on Mann-Whitney U test comparison with type 2 diabetes values used as the reference group, and the null hypothesis that there is no difference in mean HbA<sub>1c</sub> values between type 2 diabetes and the comparing group.**

|                                                    | Diabetes with no prior pancreatic disease |                       | Diabetes following pancreatic disease |                                       |                                               |
|----------------------------------------------------|-------------------------------------------|-----------------------|---------------------------------------|---------------------------------------|-----------------------------------------------|
|                                                    | Type 1 diabetes                           | Type 2 diabetes       | All                                   | Diabetes following acute pancreatitis | Diabetes following chronic pancreatic disease |
| <b><i>HbA<sub>1c</sub> at diagnosis</i></b>        |                                           |                       |                                       |                                       |                                               |
| mean (SD) [mmol/mol]                               | 12.1% (2.5%) [109 (27)]                   | 7.9% (2.0%) [63 (22)] | 8.3% (2.4%) [67 (26)]                 | 8.2% (2.3%) [66 (25)]                 | 8.6% (2.7%) [70 (29)]                         |
| p value                                            | <0.001                                    | n/a                   | 0.002                                 | 0.076                                 | 0.006                                         |
| <b><i>HbA<sub>1c</sub> at one year</i></b>         |                                           |                       |                                       |                                       |                                               |
| mean (SD) [mmol/mol]                               | 7.6% (1.7%) [60 (19)]                     | 6.8% (1.2%) [51 (13)] | 7.1% (1.5%) [54 (16)]                 | 7.1% (1.4%) [54 (15)]                 | 7.3% (1.6%) [56 (17)]                         |
| p value                                            | <0.001                                    | n/a                   | <0.001                                | 0.003                                 | 0.010                                         |
| <b><i>HbA<sub>1c</sub> at five years</i></b>       |                                           |                       |                                       |                                       |                                               |
| mean (SD) [mmol/mol]                               | 8.6% (1.7%) [70 (19)]                     | 7.2% (1.4%) [55 (15)] | 7.6% (1.7%) [60 (18)]                 | 7.6% (1.7%) [60 (18)]                 | 7.6% (1.7%) [60 (19)]                         |
| p value                                            | <0.001                                    | n/a                   | <0.001                                | 0.002                                 | 0.006                                         |
| <b><i>Missing Data</i></b>                         |                                           |                       |                                       |                                       |                                               |
| HbA <sub>1c</sub> value not recorded at one year   |                                           |                       |                                       |                                       |                                               |
| number (proportion)                                | 54 (16.5%)                                | 3226 (11.3%)          | 69 (13.6%)                            | 39 (11.8%)                            | 30 (16.9%)                                    |
| HbA <sub>1c</sub> value not recorded at five years |                                           |                       |                                       |                                       |                                               |
| number (proportion)                                | 26 (16.0%)                                | 1893 (12.3%)          | 32 (13.7%)                            | 19 (12.5%)                            | 13 (15.9%)                                    |

SUPPLEMENTARY DATA

**Supplementary Table S2.** Likelihood of poor glycaemic control

Likelihood of poor glycaemic control at one year and five years after diagnosis of diabetes, for diabetes following pancreatic disease, type 1 diabetes, and type 2 diabetes. With type 2 diabetes used as the reference group, and p values from logistic regression modelling. Odds ratios are adjusted for age, sex, ethnicity, index of multiple deprivation (IMD) score, alcohol consumption, smoking status, and body mass index.

\*n = number with poor glycaemic control, N = total with sufficient follow-up and measurement of HbA<sub>1c</sub>

|                                                                     | Diabetes with no prior pancreatic disease |                     | Diabetes following pancreatic disease |
|---------------------------------------------------------------------|-------------------------------------------|---------------------|---------------------------------------|
|                                                                     | Type 1 diabetes                           | Type 2 diabetes     | All                                   |
| <b>Poor glycaemic control at one year (HbA<sub>1c</sub> ≥ 7%)</b>   |                                           |                     |                                       |
| (n / N)*                                                            | 149/273                                   | 8264/25423          | 177/439                               |
| proportion [95% CI]                                                 | 54.6% [48.5%-60.6%]                       | 32.5% [31.9%-33.1%] | 40.3% [35.7%-45.1%]                   |
| p value                                                             | <0.001                                    | n/a                 | 0.001                                 |
| unadjusted odds ratio [95% CI]                                      | 2.1 [1.7-2.6]                             | 1.0                 | 1.4 [1.1-1.7]                         |
| p value                                                             | <0.001                                    | n/a                 | 0.001                                 |
| adjusted odds ratio [95% CI]                                        | 1.4 [1.1-1.8]                             | 1.0                 | 1.3 [1.1-1.6]                         |
| p value                                                             | 0.007                                     | n/a                 | 0.005                                 |
| <b>Poor glycaemic control at five years (HbA<sub>1c</sub> ≥ 7%)</b> |                                           |                     |                                       |
| (n / N)*                                                            | 115/137                                   | 6251/13488          | 125/202                               |
| proportion [95% CI]                                                 | 83.9% [76.5%-89.5%]                       | 46.3% [45.5%-47.2%] | 61.9% [54.8%-68.5%]                   |
| p value                                                             | <0.001                                    | n/a                 | <0.001                                |
| unadjusted odds ratio [95% CI]                                      | 3.5 [2.5-5.1]                             | 1.0                 | 1.7 [1.3-2.2]                         |
| p value                                                             | <0.001                                    | n/a                 | <0.001                                |
| adjusted odds ratio [95% CI]                                        | 2.5 [1.7-3.7]                             | 1.0                 | 1.7 [1.3-2.2]                         |
| p value                                                             | <0.001                                    | n/a                 | <0.001                                |

SUPPLEMENTARY DATA

**Supplementary Table S3. Likelihood of requiring insulin**

**Likelihood of insulin use within one year and five years after diagnosis of diabetes, for diabetes following pancreatic disease, type 1 diabetes, and type 2 diabetes; with type 2 diabetes used as the reference group, and p values from logistic regression modelling. Odds ratios are adjusted for age, sex, ethnicity, index of multiple deprivation (IMD) score, alcohol consumption, smoking status, body mass index, and HbA<sub>1c</sub> level at diagnosis.\*n = number with use of insulin, N = total with sufficient follow-up**

|                                             | Diabetes with no prior pancreatic disease | Diabetes following pancreatic disease |                                       |                                               |
|---------------------------------------------|-------------------------------------------|---------------------------------------|---------------------------------------|-----------------------------------------------|
|                                             | Type 2 diabetes                           | All                                   | Diabetes following acute pancreatitis | Diabetes following chronic pancreatic disease |
| <b><i>Insulin use within one year</i></b>   |                                           |                                       |                                       |                                               |
| (n / N)*                                    | 379/26733                                 | 76/467                                | 30/308                                | 46/159                                        |
| proportion [95% CI]                         | 1.4% [1.3%-1.6%]                          | 16.3% [13.1%-20.0%]                   | 9.7% [6.8%-13.7%]                     | 28.9% [22.2%-36.7%]                           |
| p value                                     | n/a                                       | <0.001                                | <0.001                                | <0.001                                        |
| unadjusted odds ratio [95% CI]              | 1.0                                       | 13.5 [10.3-17.5]                      | 7.5 [5.0-10.9]                        | 28.3 [19.6-40.2]                              |
| p value                                     | n/a                                       | <0.001                                | <0.001                                | <0.001                                        |
| adjusted odds ratio [95% CI]                | 1.0                                       | 9.6 [7.0-13.2]                        | 6.4 [4.1-9.7]                         | 16.4 [10.4-25.6]                              |
| p value                                     | n/a                                       | <0.001                                | <0.001                                | <0.001                                        |
| <b><i>Insulin use within five years</i></b> |                                           |                                       |                                       |                                               |
| (n / N)*                                    | 576/14080                                 | 61/206                                | 28/134                                | 33/72                                         |
| proportion [95% CI]                         | 4.1% [3.8%-4.4%]                          | 29.6% [23.6%-36.4%]                   | 20.9% [14.6%-28.9%]                   | 45.8% [34.2%-57.9%]                           |
| p value                                     | n/a                                       | <0.001                                | <0.001                                | <0.001                                        |
| unadjusted odds ratio [95% CI]              | 1.0                                       | 9.9 [7.2-13.4]                        | 6.2 [4.0-9.3]                         | 19.8 [12.3-31.7]                              |
| p value                                     | n/a                                       | <0.001                                | <0.001                                | <0.001                                        |
| adjusted odds ratio [95% CI]                | 1.0                                       | 7.4 [5.2-10.4]                        | 5.2 [3.3-8.2]                         | 12.9 [7.4-22.2]                               |
| p value                                     | n/a                                       | <0.001                                | <0.001                                | <0.001                                        |

SUPPLEMENTARY DATA

**Supplementary Table 4.** Characteristics by individual pancreatic diseases

Characteristics of patients with diabetes following pancreatic disease, displayed by their underlying pancreatic diseases. Age and BMI are at the time of diagnosis of diabetes. Age, BMI, and time before diagnosis of diabetes are median values. HbA<sub>1c</sub> figures represent mean values. Patients with a diagnosis of both acute pancreatitis and a chronic pancreatic disease (prior to their development of diabetes) are included in the chronic pancreatic disease category only. If a patient with chronic pancreatitis developed pancreatic cancer or underwent surgical resection of the pancreas before developing diabetes they are represented in the corresponding cancer or surgical resection category only. If a patient with pancreatic cancer underwent surgical resection of the pancreas before developing diabetes they are represented in the surgical resection of the pancreas group only.

\*53 cases with comorbid acute pancreatitis

†1 case with comorbid acute pancreatitis only, and 1 case with both comorbid acute pancreatitis and chronic pancreatitis

‡7 cases with comorbid acute pancreatitis only, 6 cases with comorbid chronic pancreatitis only, 12 cases with comorbid pancreatic cancer only, and 3 cases with both comorbid acute pancreatitis and chronic pancreatitis

§2 cases with both comorbid acute pancreatitis and chronic pancreatitis

||Due to universal electronic prescribing in primary care and automatic inclusion of this information in the RCGP RSC database there is no known data missing for insulin use. Prescriptions started in secondary care and discontinued after less than two weeks may not have been captured.

|                                                                                    | Diabetes following acute pancreatic disease | Diabetes following chronic pancreatic disease |                   |                                    |                  |                  |
|------------------------------------------------------------------------------------|---------------------------------------------|-----------------------------------------------|-------------------|------------------------------------|------------------|------------------|
|                                                                                    | Acute Pancreatitis                          | Chronic Pancreatitis                          | Pancreatic Cancer | Surgical Resection of the Pancreas | Cystic Fibrosis  | Haemochromatosis |
| <b>Subjects</b>                                                                    | 361                                         | 91                                            | 11                | 43                                 | 18               | 35               |
| Age (years) [IQR]                                                                  | 60 [51-72]                                  | 55 [44-66]                                    | 71 [66-82]        | 60 [51-74]                         | 38 [26-56]       | 57 [51-66]       |
| BMI (years) [IQR]                                                                  | 30.5 [27.0-36.4]                            | 25.8 [21.5-29.6]                              | 26.4 [21.6-30.4]  | 27.3 [24.0-31.5]                   | 22.5 [21.3-26.5] | 29.6 [27.3-34.0] |
| Time before diagnosis of diabetes (years) [IQR]                                    | 6.5 [2.5-13.3]                              | 5.0 [2.3-9.5]                                 | 1.2 [0.8-2.0]     | 2.1 [0.4-5.6]                      | 22.2 [14.9-31.3] | 4.9 [2.0-7.4]    |
| Subjects with comorbid pancreatic disease prior to diabetes diagnosis (proportion) | 0 (0.0%)                                    | 53 (58.2%)*                                   | 2 (18.2%)†        | 28 (65.1%)‡                        | 2 (11.1%)§       | 0 (0.0%)         |

SUPPLEMENTARY DATA

|                                                              |                            |                            |                              |                             |                              |                            |
|--------------------------------------------------------------|----------------------------|----------------------------|------------------------------|-----------------------------|------------------------------|----------------------------|
| <b><i>HbA<sub>1c</sub> at diagnosis [SD] (mmol/mol)</i></b>  | 8.2% [2.3%]<br>(66 [25])   | 9.0% [3.0%]<br>(75 [33])   | 8.3%<br>[2.0%] (67<br>[22])  | 8.2%<br>[2.2%] (66<br>[24]) | 8.7%<br>[2.7%] (72<br>[29])  | 8.2% [2.4%]<br>(66 [26])   |
| <b><i>HbA<sub>1c</sub> at one year [SD] (mmol/mol)</i></b>   | 7.1% [1.4%]<br>(54 [15])   | 7.3% [1.7%]<br>(56 [19])   | 7.5%<br>[0.3%] (58<br>[3])   | 7.5%<br>[1.5%] (58<br>[16]) | 6.9%<br>[1.0%] (52<br>[11])  | 7.0% [1.7%]<br>(53 [18])   |
| <b><i>Poor glycaemic control at one year</i></b>             |                            |                            |                              |                             |                              |                            |
| (n / N)                                                      | 113/291                    | 32/75                      | 3/3                          | 16/34                       | 5/12                         | 8/24                       |
| proportion<br>[95% CI]                                       | 38.8%<br>[33.2%-<br>44.7%] | 42.7%<br>[31.5%-<br>54.6%] | 100.0%<br>[31.0%-<br>100.0%] | 47.1%<br>[30.2%-<br>64.6%]  | 41.7%<br>[16.5%-<br>71.4%]   | 33.3%<br>[16.4%-<br>55.3%] |
| <b><i>HbA<sub>1c</sub> at five years [SD] (mmol/mol)</i></b> | 7.6% [1.7%]<br>(60 [18])   | 7.6% [1.5%]<br>(60 [16])   | 8.0% [n/a]<br>(64 [n/a])     | 8.2%<br>[1.3%] (66<br>[14]) | 8.0%<br>[3.1%] (64<br>[34])  | 7.2% [2.0%]<br>(55 [22])   |
| <b><i>Poor glycaemic control at five years</i></b>           |                            |                            |                              |                             |                              |                            |
| (n / N)                                                      | 82/133                     | 24/37                      | 1/1                          | 10/12                       | 3/7                          | 5/12                       |
| proportion<br>[95% CI]                                       | 61.7%<br>[52.8%-<br>69.8%] | 64.9%<br>[47.4%-<br>79.3%] | 100.0%<br>[5.5%-<br>100%]    | 83.3%<br>[50.9%-<br>97.1%]  | 42.9%<br>[11.8%-<br>79.8%]   | 41.7%<br>[16.5%-<br>71.4%] |
| <b><i>Insulin use within one year</i></b>                    |                            |                            |                              |                             |                              |                            |
| (n / N)                                                      | 30/308                     | 22/79                      | 0/3                          | 9/35                        | 14/17                        | 1/25                       |
| proportion<br>[95% CI]                                       | 9.7%<br>[6.8%-<br>13.7%]   | 27.8%<br>[18.6%-<br>39.2%] | 0.0%<br>[0.0%-<br>69.0%]     | 25.7%<br>[13.1%-<br>43.6%]  | 82.4%<br>[55.8%-<br>95.3%]   | 4.0%<br>[0.2%-<br>22.3%]   |
| <b><i>Insulin use within five years</i></b>                  |                            |                            |                              |                             |                              |                            |
| (n / N)                                                      | 28/134                     | 15/36                      | 0/0                          | 8/12                        | 10/10                        | 0/14                       |
| proportion<br>[95% CI]                                       | 20.9%<br>[14.6%-<br>28.9%] | 41.7%<br>[26.0%-<br>59.1%] | n/a                          | 66.7%<br>[35.4%-<br>88.7%]  | 100.0%<br>[65.5%-<br>100.0%] | 0.0%<br>[0.0%-<br>26.8%]   |
| <b><i>Missing Data</i></b>                                   |                            |                            |                              |                             |                              |                            |
| HbA <sub>1c</sub> value not recorded at one year             |                            |                            |                              |                             |                              |                            |
| number (proportion)                                          | 39 (11.8%)                 | 11 (12.8%)                 | 4 (57.1%)                    | 5 (12.8%)                   | 6 (33.3%)                    | 4 (14.3%)                  |
| HbA <sub>1c</sub> value                                      |                            |                            |                              |                             |                              |                            |

SUPPLEMENTARY DATA

|                               |            |          |          |           |           |           |
|-------------------------------|------------|----------|----------|-----------|-----------|-----------|
| not recorded<br>at five years |            |          |          |           |           |           |
| number<br>(proportion)        | 19 (12.5%) | 4 (9.8%) | 0 (0.0%) | 3 (20.0%) | 4 (36.4%) | 2 (14.3%) |
